# Supplementary material for: Tumor and reproductive traits are linked by RNA metabolism genes in the mouse ovary: a transcriptome-phenotype association analysis
Source: PubMed Central journal article supplement (PMC3045792; doi:10.1186/1471-2164-11-s5-s1), 2010-12-22
Supplement: 1471-2164-11-S5-S1-S1.pdf [file 1471-2164-11-S5-S1-S1.pdf]

Additional file 1. Table 1 – Detailed microarray ratios and Q-PCR results of selected transcripts

|                   | <i>Spp1</i>                      |                         |                                | <i>Txnrd1</i>                |                       |                               | <i>Anxa5</i>                 |                      |                               | <i>Fnl</i>                       |                         |                                | <i>Cls</i>                   |                       |                               | <i>Ctsl</i>                  |                      |                               | <i>Mtl</i>                       |                         |                                | <i>rRNA 18S</i> |
|-------------------|----------------------------------|-------------------------|--------------------------------|------------------------------|-----------------------|-------------------------------|------------------------------|----------------------|-------------------------------|----------------------------------|-------------------------|--------------------------------|------------------------------|-----------------------|-------------------------------|------------------------------|----------------------|-------------------------------|----------------------------------|-------------------------|--------------------------------|-----------------|
|                   | MA (d) <sup>a</sup>              | MA (r) <sup>a</sup>     | Q-PCR <sup>b</sup>             | MA (d)                       | MA (r)                | Q-PCR                         | MA (d)                       | MA (r)               | Q-PCR                         | MA (d)                           | MA (r)                  | Q-PCR                          | MA (d)                       | MA (r)                | Q-PCR                         | MA (d)                       | MA (r)               | Q-PCR                         | MA (d)                           | MA (r)                  | Q-PCR                          | Q-PCR           |
| BALBc             | -5.07<br>-4.92<br>-1.31          | -1.17<br>-5.20<br>-5.29 | <b>-4.27</b><br>26.72<br>26.81 | 0.14<br>-0.04<br>0.21        | 0.14<br>0.16<br>0.15  | <b>2.85</b><br>29.82<br>28.72 | 0.55<br>0.72<br>-0.31        | 1.01<br>0.65<br>0.56 | <b>3.42</b><br>20.74<br>20.65 | -3.00<br>-2.29<br>-1.06          | -0.96<br>-2.68<br>-2.86 | <b>-1.13</b><br>22.18<br>22.10 | 0.60<br>0.91<br>0.12         | -0.01<br>0.63<br>0.79 | <b>1.64</b><br>23.97<br>23.97 | 1.34<br>1.25<br>1.05         | 0.52<br>1.65<br>1.48 | <b>2.06</b><br>20.54<br>20.92 | -1.02<br>-0.82<br>-0.11          | 0.63<br>-1.56<br>-1.48  | <b>0.01</b><br>19.91<br>19.91  | 17.63<br>17.74  |
| C57BL/6           | -3.47<br>-4.64<br>-4.27<br>-3.09 | -4.38<br>-4.21          | <b>-4.86</b><br>26.75<br>26.93 | 0.11<br>0.21<br>0.21<br>0.48 | 0.01<br>0.04          | <b>1.02</b><br>30.72<br>30.47 | 0.77<br>0.66<br>0.76<br>0.33 | 0.78<br>0.55         | <b>1.90</b><br>21.63<br>21.76 | -2.57<br>-2.40<br>-3.01<br>-2.23 | -2.45<br>-2.31          | <b>-1.75</b><br>22.31<br>22.20 | 1.74<br>1.53<br>0.46<br>1.48 | 1.30<br>0.97          | <b>0.98</b><br>24.01<br>22.24 | 1.33<br>1.17<br>1.72<br>1.91 | 1.41<br>1.09         | <b>0.64</b><br>21.58<br>21.70 | -0.66<br>-0.74<br>-0.61<br>-0.38 | -0.81<br>-0.96          | <b>-1.25</b><br>20.51<br>20.81 | 17.08<br>17.26  |
| FVB               | -1.12<br>-1.02                   | -0.78<br>-0.26<br>-1.06 | <b>-2.48</b><br>24.47<br>24.89 | 0.25<br>0.51                 | 0.19<br>0.11<br>0.07  | <b>0.84</b><br>31.05<br>30.93 | 0.21<br>0.53                 | 0.22<br>0.32<br>0.15 | <b>0.98</b><br>23.03<br>22.65 | -3.46<br>-2.27                   | -0.65<br>-0.89<br>-1.50 | <b>-0.83</b><br>21.14<br>21.96 | 0.15<br>0.58                 | 0.27<br>-0.41<br>0.37 | <b>1.78</b><br>23.41<br>23.68 | 0.70<br>0.44                 | 0.79<br>0.43<br>0.35 | <b>2.11</b><br>20.09<br>20.69 | -0.81<br>-0.53                   | -0.88<br>0.00<br>-0.82  | <b>-0.11</b><br>19.63<br>19.85 | 17.47<br>17.32  |
| SWR               | -3.10<br>-2.94<br>-2.86          | -2.28<br>-2.86<br>-2.49 | <b>-2.76</b><br>23.92<br>23.93 | 0.33<br>0.41<br>0.33         | -0.08<br>0.09<br>0.19 | <b>0.78</b><br>30.50<br>30.38 | 0.33<br>0.32<br>0.49         | 0.04<br>0.15<br>0.00 | <b>0.71</b><br>23.75<br>24.09 | -2.11<br>-2.11<br>-1.72          | -0.96<br>-1.21<br>-1.13 | <b>-2.00</b><br>22.04<br>22.20 | 1.18<br>1.26<br>0.91         | 0.68<br>0.31<br>0.87  | <b>0.72</b><br>23.90<br>24.08 | 1.52<br>1.37<br>1.52         | 0.79<br>0.83<br>1.02 | <b>1.25</b><br>20.45<br>20.83 | -0.76<br>-0.80<br>-0.95          | -0.79<br>-0.73<br>-0.92 | <b>-1.36</b><br>20.52<br>20.24 | 16.70<br>16.88  |
| Ref. <sup>c</sup> | -                                | -                       | 23.91<br>23.79                 | -                            | -                     | 33.16<br>33.80                | -                            | -                    | 25.43<br>25.51                | -                                | -                       | 22.43<br>22.32                 | -                            | -                     | 26.97<br>26.98                | -                            | -                    | 24.41<br>23.88                | -                                | -                       | 21.43<br>21.12                 | 19.08<br>19.01  |

<sup>a</sup> Direct (d) and reverse (r) microarray (MA) normalized results are shown. Reverse ratios were multiplied by (-1) to facilitate comparison of replicates. Note that the C57BL/6 series consist of 4 direct and 2 reverse replicate microarray experiments, whereas the FVB series consisted of 2 direct and 3 reverse replicates.

<sup>b</sup> Quantitative PCR-derived ratios (bold font) were calculated from the average of duplicate Ct values shown below of each ratio, according to formulas described in Materials and Methods.

<sup>c</sup> A “common reference” experimental design was used. All microarray results shown were obtained with the same reference RNA sample (see Materials and Methods). The internal housekeeping gene was the 18S rRNA (leftmost column) and was assayed under identical conditions with respect to the measured transcripts.

**Additional file 1. Table 2 - Functional analysis of genes correlated to all phenotypes <sup>a</sup>**

| <i>Term</i> <sup>a</sup>                                   | <i>Count</i> <sup>b</sup> | <i>Fold Enrichment</i> <sup>c</sup> | <i>Adjusted p</i> <sup>d</sup> |
|------------------------------------------------------------|---------------------------|-------------------------------------|--------------------------------|
| BP00044:mRNA transcription regulation                      | 201                       | 1.39                                | 2.1E-07                        |
| MF00042:Nucleic acid binding                               | 187                       | 1.60                                | 6.1E-12                        |
| BP00048:mRNA splicing                                      | 136                       | 1.35                                | 1.7E-03                        |
| BP00040:mRNA transcription                                 | 135                       | 1.50                                | 9.9E-06                        |
| MF00224:KRAB box transcription factor                      | 118                       | 1.46                                | 6.1E-04                        |
| BP00071:Proteolysis                                        | 103                       | 1.36                                | 1.8E-02                        |
| MF00213:Non-receptor serine/threonine protein kinase       | 97                        | 1.48                                | 2.0E-03                        |
| BP00031:Nucleoside, nucleotide and nucleic acid metabolism | 96                        | 2.01                                | 3.6E-09                        |
| BP00104:G-protein mediated signaling                       | 71                        | 1.37                                | 4.8E-02                        |
| BP00063:Protein modification                               | 70                        | 1.73                                | 3.3E-04                        |
| BP00286:Cell structure                                     | 70                        | 1.44                                | 2.9E-02                        |
| MF00212:Other G-protein modulator                          | 67                        | 1.56                                | 7.6E-03                        |
| BP00060:Protein metabolism and modification                | 63                        | 1.48                                | 3.1E-02                        |
| MF00262:Non-motor actin binding protein                    | 61                        | 1.59                                | 8.9E-03                        |
| MF00101:Guanyl-nucleotide exchange factor                  | 54                        | 1.65                                | 8.5E-03                        |
| BP00064:Protein phosphorylation                            | 50                        | 1.49                                | 4.7E-02                        |
| BP00193:Developmental processes                            | 44                        | 1.53                                | 4.6E-02                        |
| MF00242:RNA helicase                                       | 42                        | 2.09                                | 9.5E-04                        |
| BP00285:Cell structure and motility                        | 38                        | 1.80                                | 1.8E-02                        |
| BP00077:Oxidative phosphorylation                          | 35                        | 1.65                                | 4.6E-02                        |
| BP00224:Cell proliferation and differentiation             | 29                        | 1.85                                | 3.4E-02                        |
| MF00211:Kinase activator                                   | 28                        | 2.39                                | 2.2E-03                        |
| MF00033:Voltage-gated calcium channel                      | 27                        | 2.06                                | 1.6E-02                        |
| MF00053:Other RNA-binding protein                          | 26                        | 2.60                                | 1.7E-03                        |
| BP00179:Apoptosis                                          | 25                        | 2.33                                | 8.0E-03                        |
| BP00273:Chromatin packaging and remodeling                 | 24                        | 1.90                                | 4.9E-02                        |
| MF00264:Microtubule family cytoskeletal protein            | 22                        | 2.17                                | 2.6E-02                        |

|                                              |    |      |         |
|----------------------------------------------|----|------|---------|
| MF00006:Interleukin receptor                 | 20 | 2.16 | 4.0E-02 |
| MF00275:Transcription cofactor               | 19 | 2.28 | 3.3E-02 |
| MF00267:Membrane traffic protein             | 18 | 2.54 | 1.7E-02 |
| BP00069:Protein disulfide-isomerase reaction | 18 | 2.53 | 2.1E-02 |
| BP00145:Small molecule transport             | 18 | 2.24 | 4.4E-02 |
| BP00062:Protein folding                      | 17 | 2.49 | 3.0E-02 |
| BP00201:Skeletal development                 | 16 | 2.46 | 3.5E-02 |
| MF00069:Ribonucleoprotein                    | 12 | 3.50 | 1.7E-02 |
| BP00018:Other amino acid metabolism          | 10 | 3.56 | 3.6E-02 |
| BP00284:Hematopoiesis                        | 7  | 4.70 | 4.9E-02 |

<sup>a</sup> Performed in the DAVID Bioinformatic Resources 2008 (<http://david.abcc.ncifcrf.gov/>) using the PANTHER's database categories.

<sup>b</sup> Note that gene identity is usually redundant between functionally related terms.

<sup>c</sup> Defined with a Fischer exact test ( $p < 0.01$ ) to determine random occurrence with respect to the complete mouse genome.

<sup>d</sup> P-value corrected with the Benjamini test for multiple test adjustment.

**Additional file 1. Table 3 – Gene Ontology profile of genes differentially expressed between SWR and the remaining three strains <sup>a</sup>**

| <i>Term</i> <sup>a</sup>                         | <i>Genes</i> <sup>b</sup>                         | <i>p</i> <sup>c</sup> |
|--------------------------------------------------|---------------------------------------------------|-----------------------|
| Endomembrane system                              | Bsc1, Ulk1, Appbp2, Chst12, Ccar1, Copz1, Nup160  | 8.16E-04              |
| Establishment of protein localization            | Stx18, Lman2, Appbp2, Gdi1, Copz1, Sh3glb1, Atg9a | 2.64E-02              |
| Apoptosis                                        | App, Ubqln1, Ccar1, Cfdp1, Cd1d1, Sh3glb1         | 4.35E-02              |
| Ubiquitin cycle                                  | Ubqln1, Herc1, Rbbp6, Usp9x, Atg9a                | 1.45E-02              |
| Golgi apparatus                                  | Stx18, App, Chst12, Copz1, B4galt1                | 9.06E-03              |
| Organelle envelope                               | Mosc2, Csde1, Ccar1, Nup160, Sh3glb1              | 3.00E-02              |
| mRNA processing                                  | App, Snrpf, Tsen34, Sf3b1                         | 9.75E-03              |
| Actin cytoskeleton                               | Actb, Csrp1, Tpm1, Cald1                          | 1.07E-02              |
| Extracellular matrix organization and biogenesis | App, Aplp2, B4galt1                               | 3.01E-03              |
| Suckling behavior                                | App, Aplp2                                        | 1.50E-02              |

<sup>a</sup> A t-test with FDR<sub>indep</sub> and 200,000 permutations was done with Pomelo II (see Methods). Statistically significant genes not common with the other tests (ANOVA and Regression) were subjected to a GO analysis with WebGestalt (<http://bioinfo.vanderbilt.edu/webgestalt/>).

<sup>b</sup> Note that gene lists displays some redundancy between functionally related terms.

<sup>c</sup> GO analysis used an hypergeometric test. GO categories were selected from a Direct Acyclic Graph with a threshold p-value  $\leq 0.05$ .

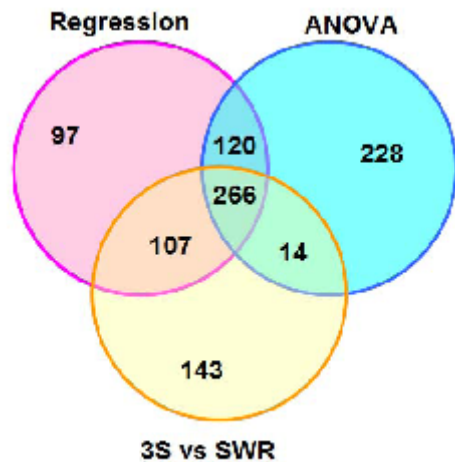

**Additional file 1. Figure 1 – Summary of statistical tests among ovarian transcriptional profiles of four mouse strains**

Statistically significant results of the regression analysis (590 clones), ANOVA (628 clones) and a t-test (530 clones) with FDR control. Regression and ANOVA were done between the four strains while the t-test was performed between SWR and the remaining three strains (3S vs SWR). The Venn diagram depicts coincidence and divergence between tests. The t-test results not common with the Regression and the ANOVA results were reduced to a list of 91 unique gene identities which were subjected to the functional analysis described in Supplementary Table 3.
